# Supplementary material for: A simplified vortex-assisted emulsification microextraction method for determining personal care products in environmental water samples by ultra-high-performance liquid chromatography
Source: Royal Society of Chemistry journal article supplement (doi:10.1039/c4ay02629b), 2015-01-01
Supplement: c4ay02629b1.pdf [file c4ay02629b1.pdf]

### Figure S1

Influence of the aqueous sample pH on the VAEME performance, using tetrachlorethylene as extractant solvent in this representative plot.

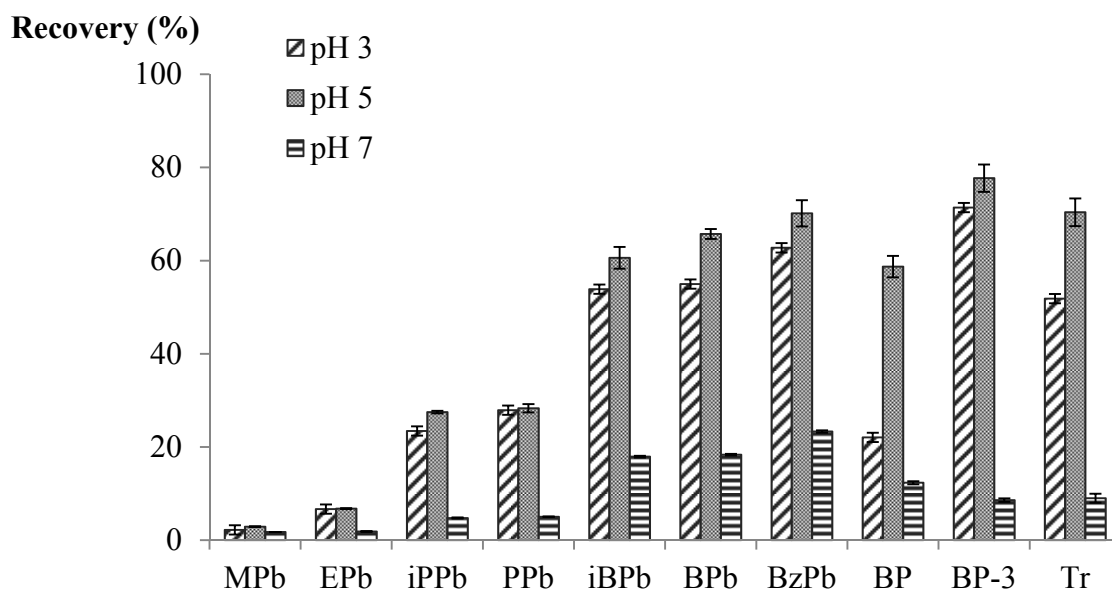

**Figure S2**

Influence of the utilization of acetonitrile in the VAEME performance.

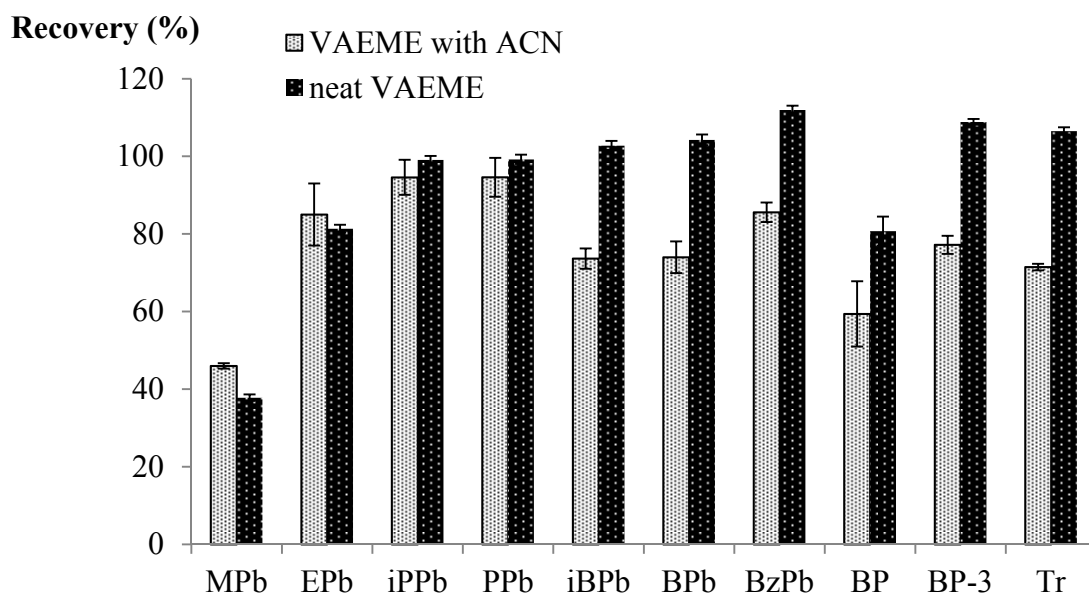

**Table S1**

Several quality analytical parameters of the chromatographic method.

| PCPs         | (Slope $\pm$ S <sub>b</sub> <sup>a</sup> ) | (Intercept $\pm$ S <sub>a</sub> <sup>b</sup> ) | S <sub>y/x</sub> $\times 10^{-3}$ | R <sup>2</sup> | LOD <sup>c</sup> | LOQ <sup>c</sup> | RSD <sup>d</sup> (%)                    |                                         |                                         |
|--------------|--------------------------------------------|------------------------------------------------|-----------------------------------|----------------|------------------|------------------|-----------------------------------------|-----------------------------------------|-----------------------------------------|
|              | $\times 10^{-3}$                           | $\times 10^{-3}$                               |                                   |                |                  |                  | Spiked level:<br>0.1 mg·L <sup>-1</sup> | Spiked level:<br>1.0 mg·L <sup>-1</sup> | Spiked level:<br>1.7 mg·L <sup>-1</sup> |
| MPb          | 351 $\pm$ 3                                | -2 $\pm$ 3                                     | 4.29                              | 0.9997         | 0.011            | 0.025            | 1.10                                    | 1.08                                    | 0.53                                    |
| EPb          | 361 $\pm$ 3                                | -2 $\pm$ 3                                     | 4.78                              | 0.9997         | 0.013            | 0.028            | 0.43                                    | 1.06                                    | 0.38                                    |
| <i>i</i> PPb | 324 $\pm$ 2                                | -1 $\pm$ 3                                     | 4.05                              | 0.9997         | 0.010            | 0.026            | 1.38                                    | 1.07                                    | 0.38                                    |
| PPb          | 352 $\pm$ 2                                | 0.4 $\pm$ 2.5                                  | 3.69                              | 0.9998         | 0.005            | 0.020            | 1.55                                    | 1.12                                    | 0.40                                    |
| <i>i</i> BPb | 301 $\pm$ 2                                | -2 $\pm$ 2                                     | 3.65                              | 0.9997         | 0.023            | 0.061            | 1.69                                    | 1.31                                    | 0.48                                    |
| BPb          | 321 $\pm$ 5                                | 2 $\pm$ 5                                      | 7.68                              | 0.9990         | 0.014            | 0.058            | 1.82                                    | 0.91                                    | 0.70                                    |
| BzPb         | 256 $\pm$ 3                                | -3 $\pm$ 3                                     | 4.58                              | 0.9994         | 0.029            | 0.073            | 0.91                                    | 1.18                                    | 0.70                                    |
| BP           | 334 $\pm$ 5                                | -8 $\pm$ 5                                     | 8.16                              | 0.9990         | 0.059            | 0.140            | -                                       | 0.61                                    | 0.92                                    |
| BP-3         | 165 $\pm$ 3                                | -4 $\pm$ 4                                     | 5.87                              | 0.9978         | 0.056            | 0.126            | -                                       | 2.31                                    | 1.59                                    |
| Tr           | 50 $\pm$ 1                                 | 0.3 $\pm$ 1.4                                  | 2.15                              | 0.9968         | 0.029            | 0.110            | -                                       | 2.82                                    | 2.13                                    |

<sup>a</sup>Error associated to slope, for a concentration range of 0.01 to 2.00 mg·L<sup>-1</sup> (n = 7)<sup>b</sup>Error associated to intercept, for a concentration range of 0.01 to 2.00 mg·L<sup>-1</sup> (n = 7)<sup>c</sup>LOD and LOQ calculated according to the ratio S/N as 3 and 10 times, respectively<sup>d</sup>Relative standard deviation (intra-day precision, n = 6)

**Table S2**

Several quality analytical parameters of the calibrations for the overall method (VAEME-UHPLC-UV), using tetrachloroethylene as extractant solvent.

| PCPs         | Concentration range<br>( $\mu\text{g}\cdot\text{L}^{-1}$ ) | (Slope $\pm$ $S_b^a$ )<br>$\times 10^{-3}$ | (Intercept $\pm$ $S_a^b$ )<br>$\times 10^{-3}$ | $S_{y/x} \times 10^{-3}$ | $R^2$  | LOQ <sup>c</sup><br>( $\mu\text{g}\cdot\text{L}^{-1}$ ) |
|--------------|------------------------------------------------------------|--------------------------------------------|------------------------------------------------|--------------------------|--------|---------------------------------------------------------|
| MPb          | 4 – 834                                                    | $0.23 \pm 0.01$                            | $15 \pm 3$                                     | 4.17                     | 0.9971 | 49.8                                                    |
| EPb          | 2 – 417                                                    | $1.07 \pm 0.02$                            | $14 \pm 5$                                     | 6.88                     | 0.9985 | 8.10                                                    |
| <i>i</i> PPb | 0.4 – 88                                                   | $5.7 \pm 0.1$                              | $3 \pm 5$                                      | 7.00                     | 0.9990 | 4.87                                                    |
| PPb          | 0.4 – 83                                                   | $5.6 \pm 0.1$                              | $8 \pm 3$                                      | 4.97                     | 0.9993 | 4.16                                                    |
| <i>i</i> BPb | 0.2 – 44                                                   | $12.2 \pm 0.3$                             | $1 \pm 8$                                      | 11.0                     | 0.9979 | 2.62                                                    |
| BPb          | 0.2 – 25                                                   | $12.5 \pm 0.1$                             | $5 \pm 2$                                      | 2.26                     | 0.9997 | 2.73                                                    |
| BzPb         | 0.2 – 35                                                   | $7.8 \pm 0.1$                              | $18 \pm 2$                                     | 3.02                     | 0.9993 | 3.53                                                    |
| BP           | 6 – 38                                                     | $19.4 \pm 0.5$                             | $-86 \pm 13$                                   | 12.9                     | 0.9980 | 7.31                                                    |
| BP-3         | 5 – 35                                                     | $20.5 \pm 0.1$                             | $-35 \pm 2$                                    | 2.78                     | 0.9999 | 6.61                                                    |
| Tr           | 5 – 35                                                     | $4.68 \pm 0.04$                            | $-10 \pm 1$                                    | 0.92                     | 0.9998 | 9.99                                                    |

<sup>a</sup>Error associated to slope (n = 6)

<sup>b</sup>Error associated to intercept (n = 6)

<sup>c</sup>LOQ calculated according to the ratio S/N as 10 times
